# Supplementary material for: Pulmonary Arteriovenous Malformation and Its Vascular Mimickers
Source: PubMed Central journal article supplement — Korean J Radiol. 2022 Jan 4;23(2):202–17. doi: 10.3348/kjr.2021.0417 (PMC8814702; doi:10.3348/kjr.2021.0417), 2022-01-04
Supplement: kjr-23-202-s001.pdf [file kjr-23-202-s001.pdf]

## SUPPLEMENT

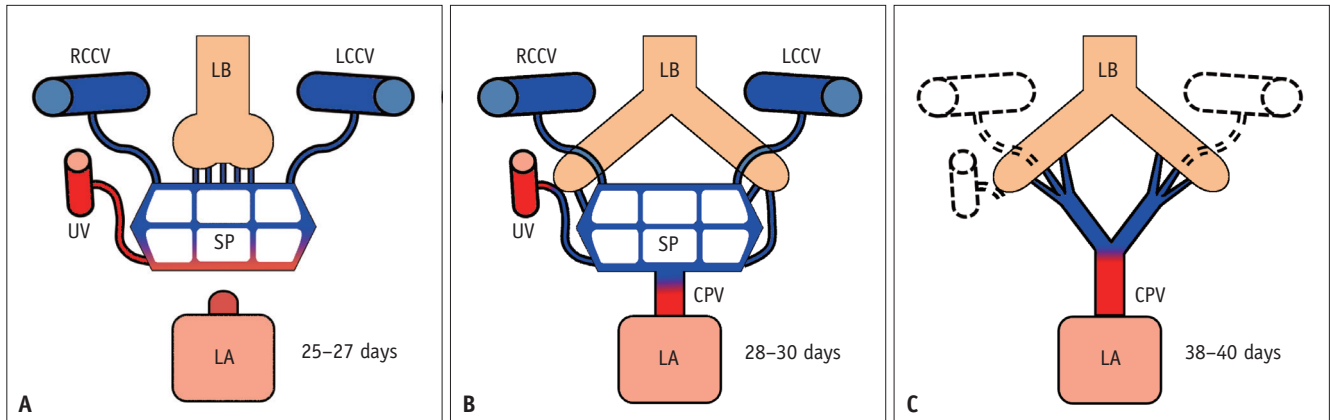

**Supplementary Fig. 1. Illustration of the normal development of the pulmonary veins from the SP during the first month of embryogenesis (A-C).** CPV = common pulmonary vein, LA = left atrium, LB = lung buds, LCCV = left common cardinal vein, RCCV = right common cardinal vein, SP = splanchnic plexus, UV = umbilicovitelline vein

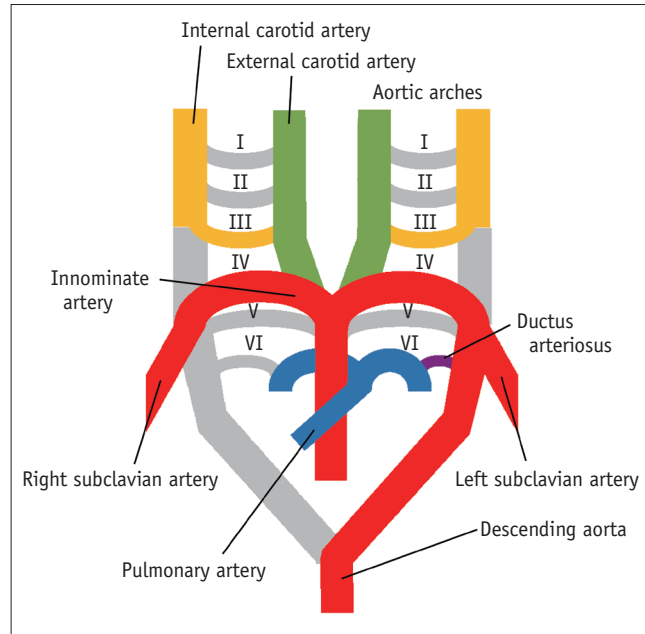

**Supplementary Fig. 2. Outline of the embryological development of the pulmonary arteries from the 6th pharyngeal arch.**

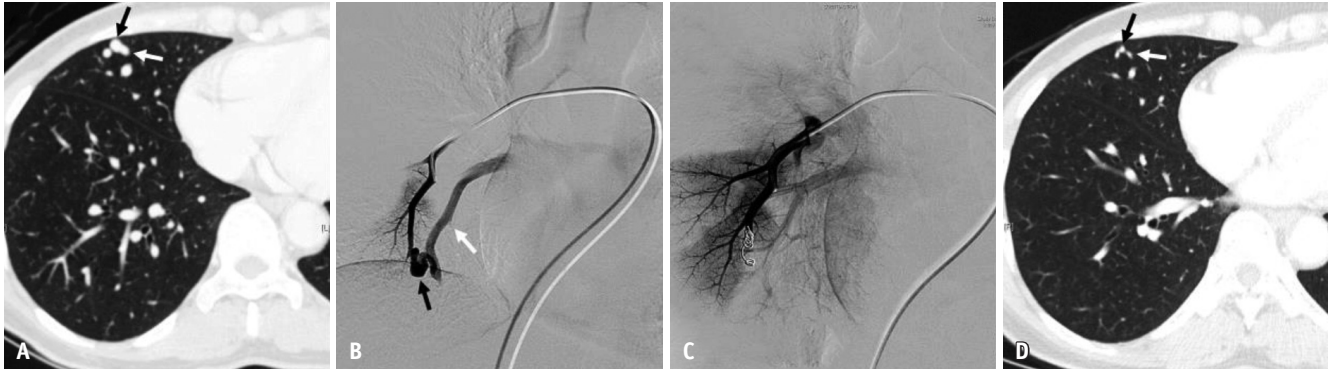

**Supplementary Fig. 3. A 48-year-old female patient who underwent transcatheter embolization of a pulmonary arteriovenous malformation.**

**A, B.** Axial chest CT scan and a selective pulmonary angiogram acquired before embolization shows a sac (black arrows), and a dilated drainage vein (white arrows) of pulmonary arteriovenous malformation in the right middle lobe. **C.** Pulmonary angiogram obtained after embolization demonstrates complete occlusion of the pulmonary arteriovenous malformation. **D.** Axial chest CT scan obtained 17 months after embolization demonstrates a decrease in diameter of the sac (black arrow) and the draining vein (white arrow).

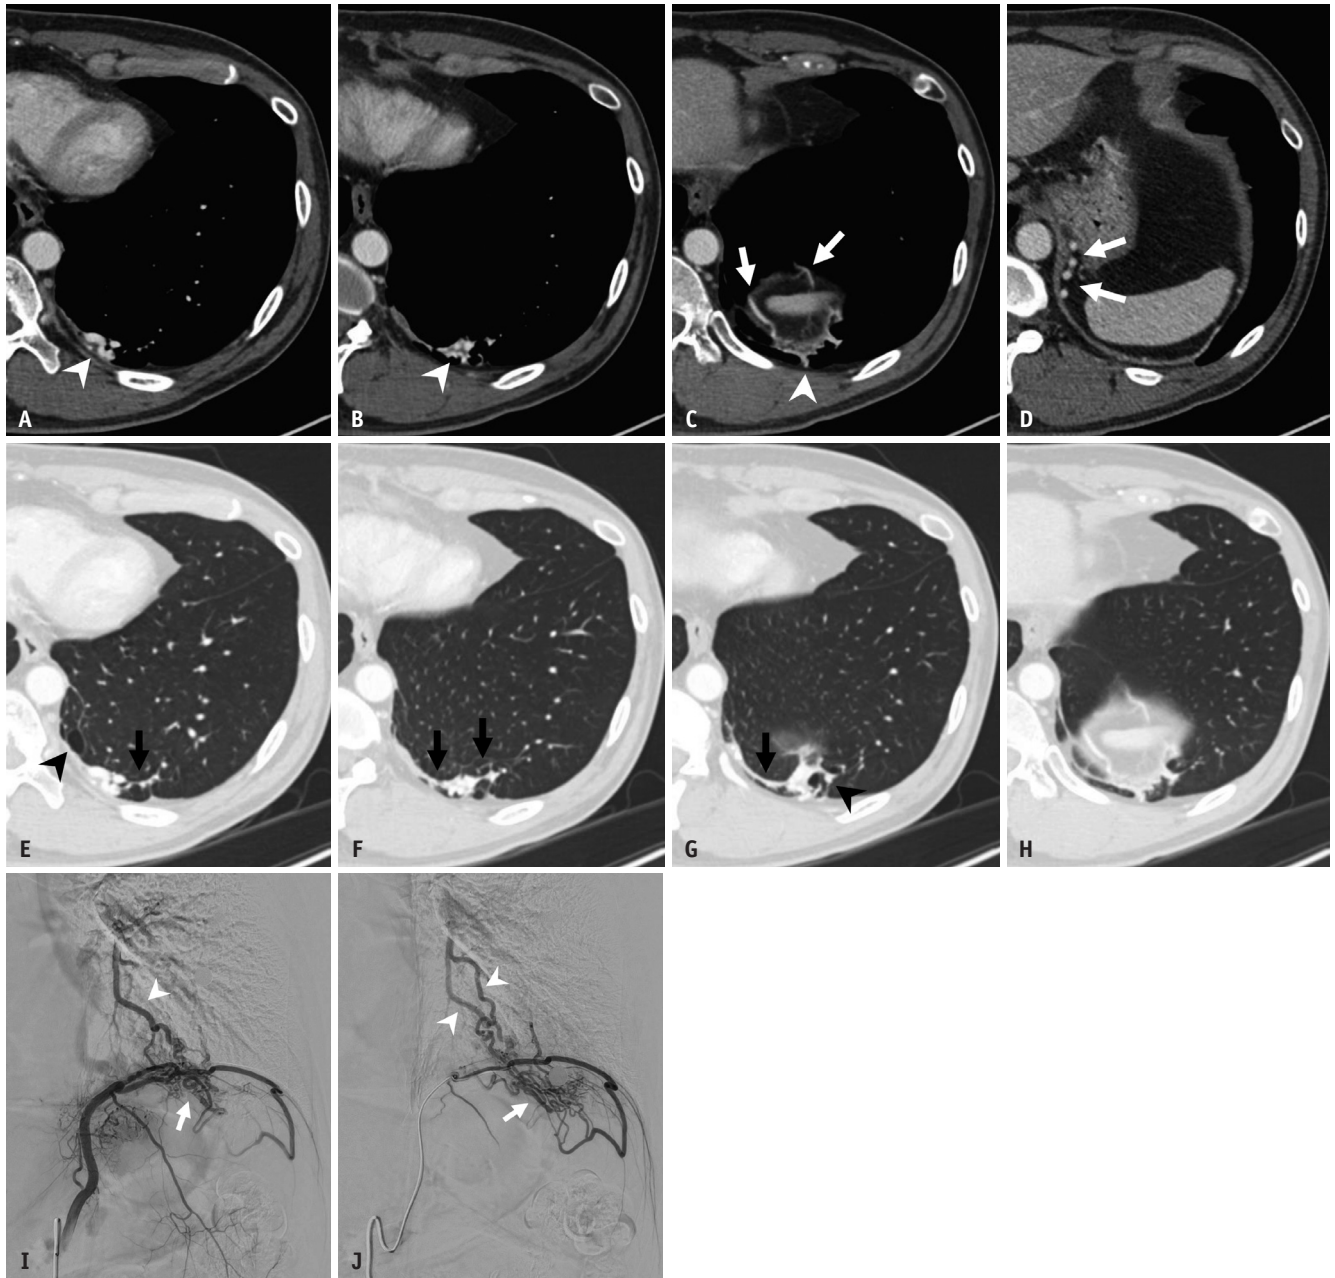

**Supplementary Fig. 4. Systemic arterial supply to the lung in a 42-year-old male with exertional dyspnea.**

**A-D.** Serial contrast-enhanced axial CT images with a mediastinal window setting show engorged vascular structures along the pleural surface (arrowheads), connected with branches from hypertrophied left inferior phrenic artery (arrows). **E-H.** Serial contrast-enhanced axial CT images with a lung window setting demonstrate architectural distortion of the lung parenchyma (arrows) and cystic airspaces (arrowheads) around engorged vascular structures. **I, J.** Selective left inferior phrenic angiograms show the hypertrophied left inferior phrenic artery and pulmonary arteries (arrowheads) opacified by the systemic-to-pulmonary artery shunt (arrows).

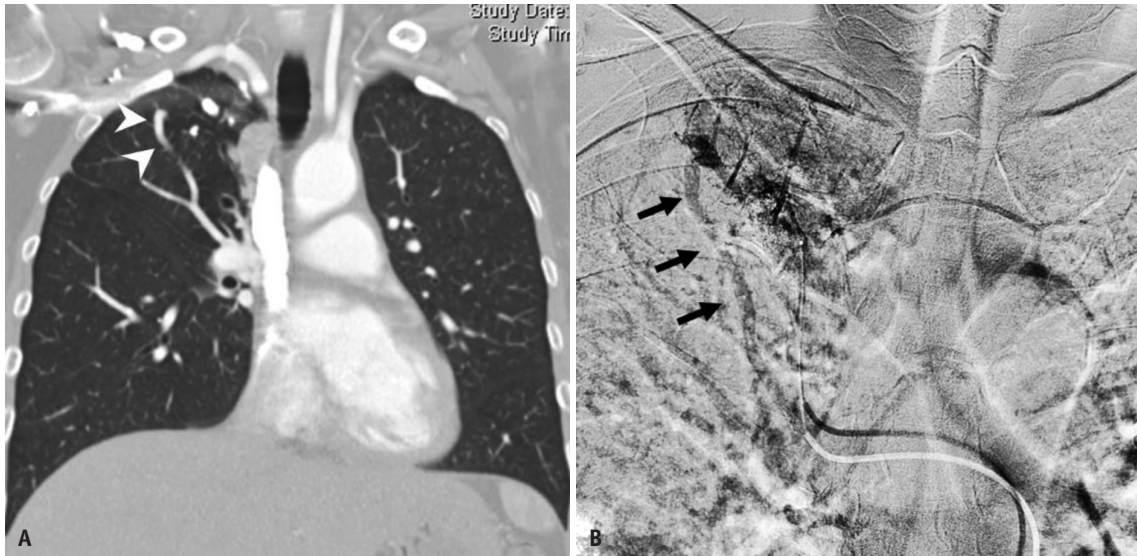

**Supplementary Fig. 5. A 57-year-old female with an anomalous pulmonary vein at the subsegmental level.**

**A.** Coronal CT images demonstrate an abnormal tortuous vascular structure (arrowheads) at the right upper lobe. **B.** The super-selective right pulmonary angiogram shows that parts of the right apical segment drain directly into the right superior pulmonary vein via a dilated tortuous collateral vein (arrows).

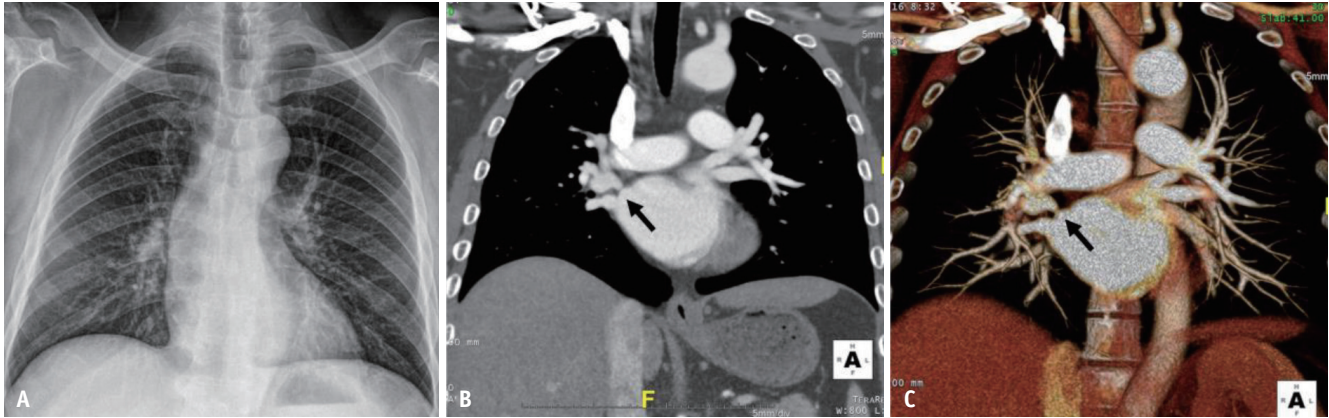

**Supplementary Fig. 6. Incidentally found pulmonary vein stenosis in a 52-year-old male.**

**A.** Chest radiograph shows no definite abnormality. **B, C.** Coronal CT and three-dimensional volume-rendering images demonstrate focal tight stenosis (arrows) involving the right superior pulmonary vein.

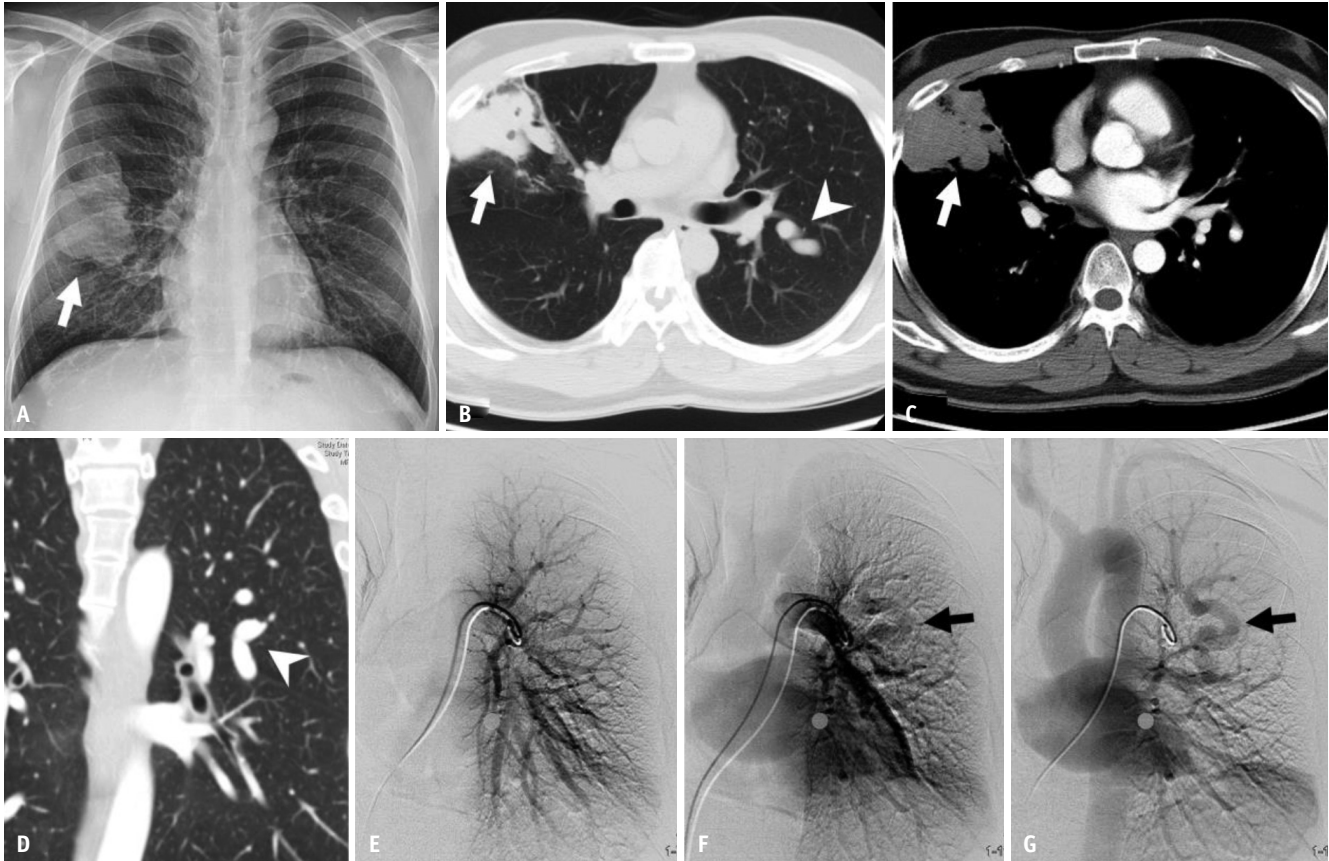

**Supplementary Fig. 7. Pulmonary vein varix associated with congenital cystic adenomatoid malformation type 1 in a 39-year-old male.**

**A.** Chest radiograph shows a mass-like increased opacity (arrow) in the right mid-zone. **B-D.** Contrast-enhanced CT images with lung and mediastinal window settings show a mixed solid and cystic mass (arrows) involving the right upper lobe consistent with a cystic adenomatoid malformation. An abnormal tortuous vascular dilatation (arrowheads) is also noted in the left parahilar area. **E.** The selective left pulmonary angiogram shows no evidence of arterial dilatation or arteriovenous fistula. **F, G.** Delayed pulmonary venous return from the left upper lobe drained directly into the proximal superior pulmonary vein via a dilated tortuous collateral vein, representing pulmonary vein varix (arrows).

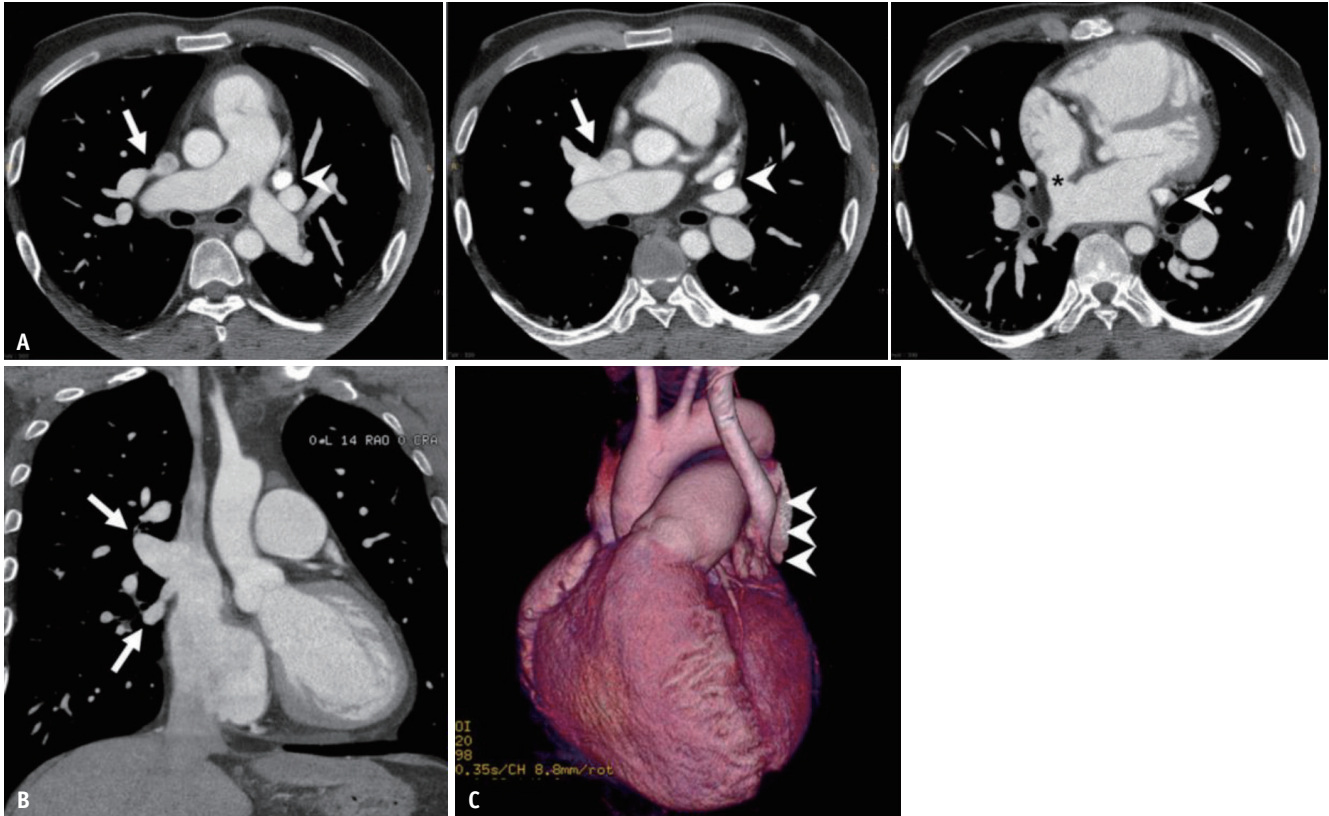

**Supplementary Fig. 8. Partial anomalous pulmonary venous drainage involving the right superior pulmonary vein in a 40-year-old male.**

**A.** Serial axial CT images show that the right superior pulmonary vein drains into the superior vena cava (arrows). The right inferior pulmonary vein has a normal connection with the left atrium. A superior sinus venosus atrial septal defect (\*) caused marked right ventricular dilatation. A persistent left superior vena cava (arrowheads) is also noted. **B.** Coronal CT image shows that right superior pulmonary veins (arrows) from the right upper and middle lobes joined the superior vena cava. **C.** Three-dimensional volume-rendering of the persistent left superior vena cava (arrowheads) draining into the coronary sinus.



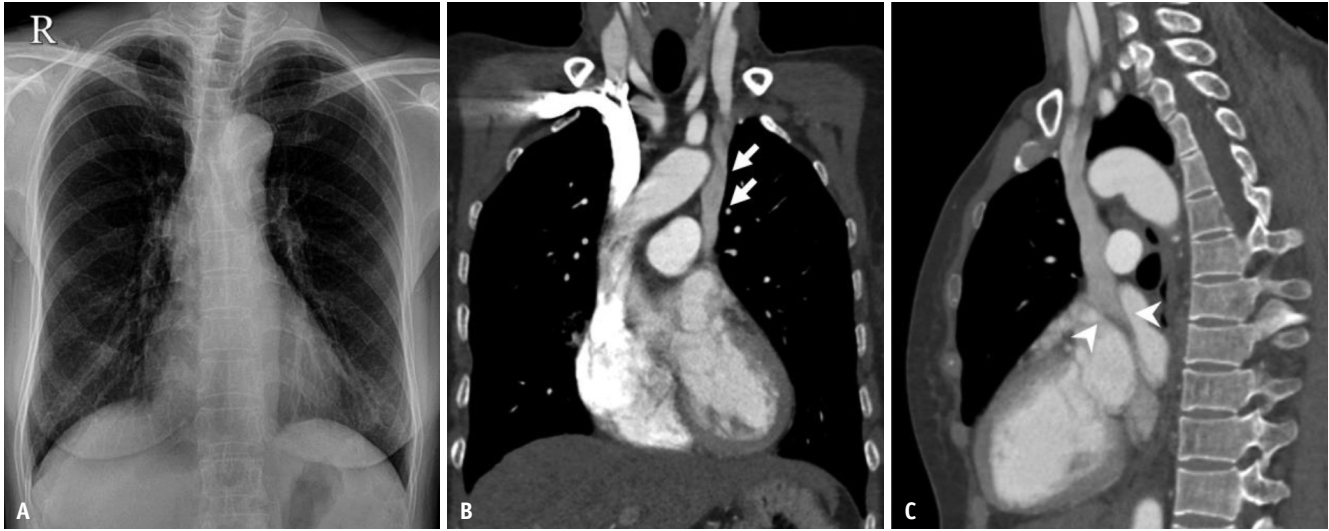

**Supplementary Fig. 9. Left superior vena cava in a 62-year-old female.**

**A.** Chest radiograph shows no definite abnormality. **B, C.** The reformatted coronal and oblique sagittal CT images show left superior vena cava (arrows) coursing inferiorly to the left of the aortic arch and draining into the coronary sinus (arrowheads).

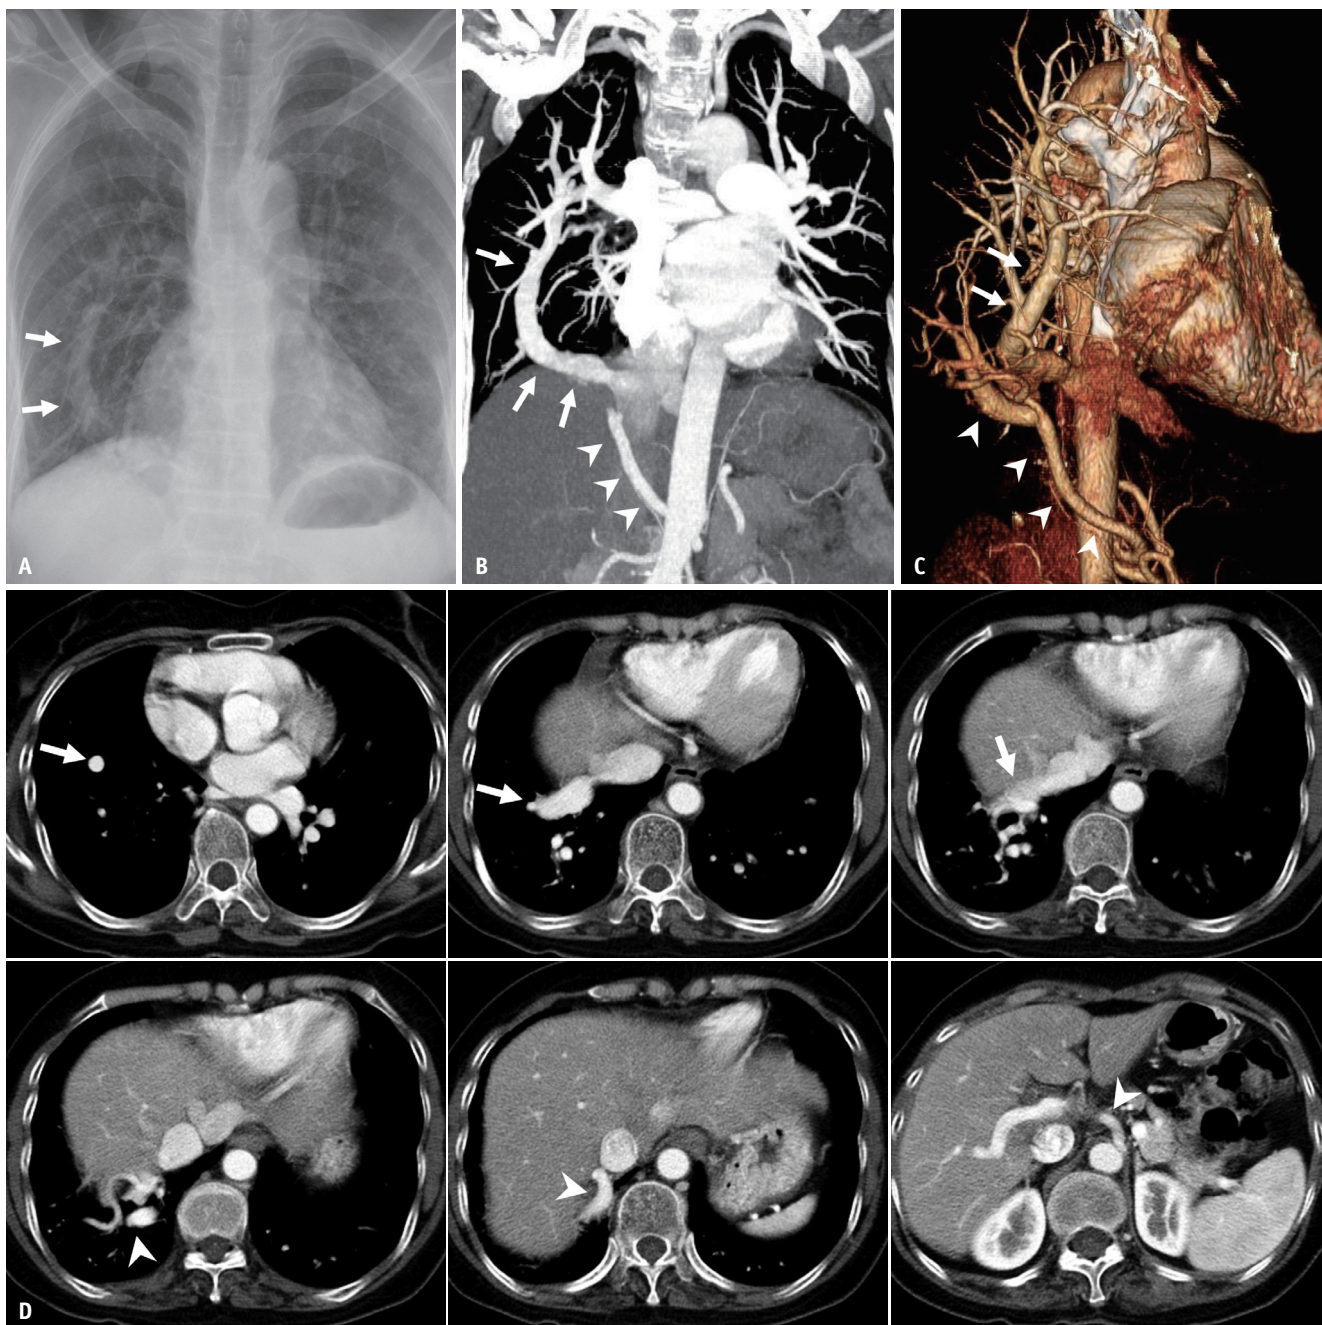

**Supplementary Fig. 10. Scimitar syndrome in a 56-year-old female.**

**A.** Chest radiographs show a curvilinear vascular marking (arrows) adjacent to the right heart border, as well as a reduced volume in the right lung field. **B, C.** Coronal CT image and volume-rendered image demonstrate the anomalous curvilinear pulmonary vein (arrows) draining into the infra-diaphragmatic inferior vena cava. Aberrant systemic arterial supply (arrowheads) from the abdominal aorta to the right lung is noted. **D.** Serial axial CT images show a tangled vascular structure in the right lower lobe consisting of an anomalous pulmonary vein (arrows) and aberrant systemic artery (arrowheads).

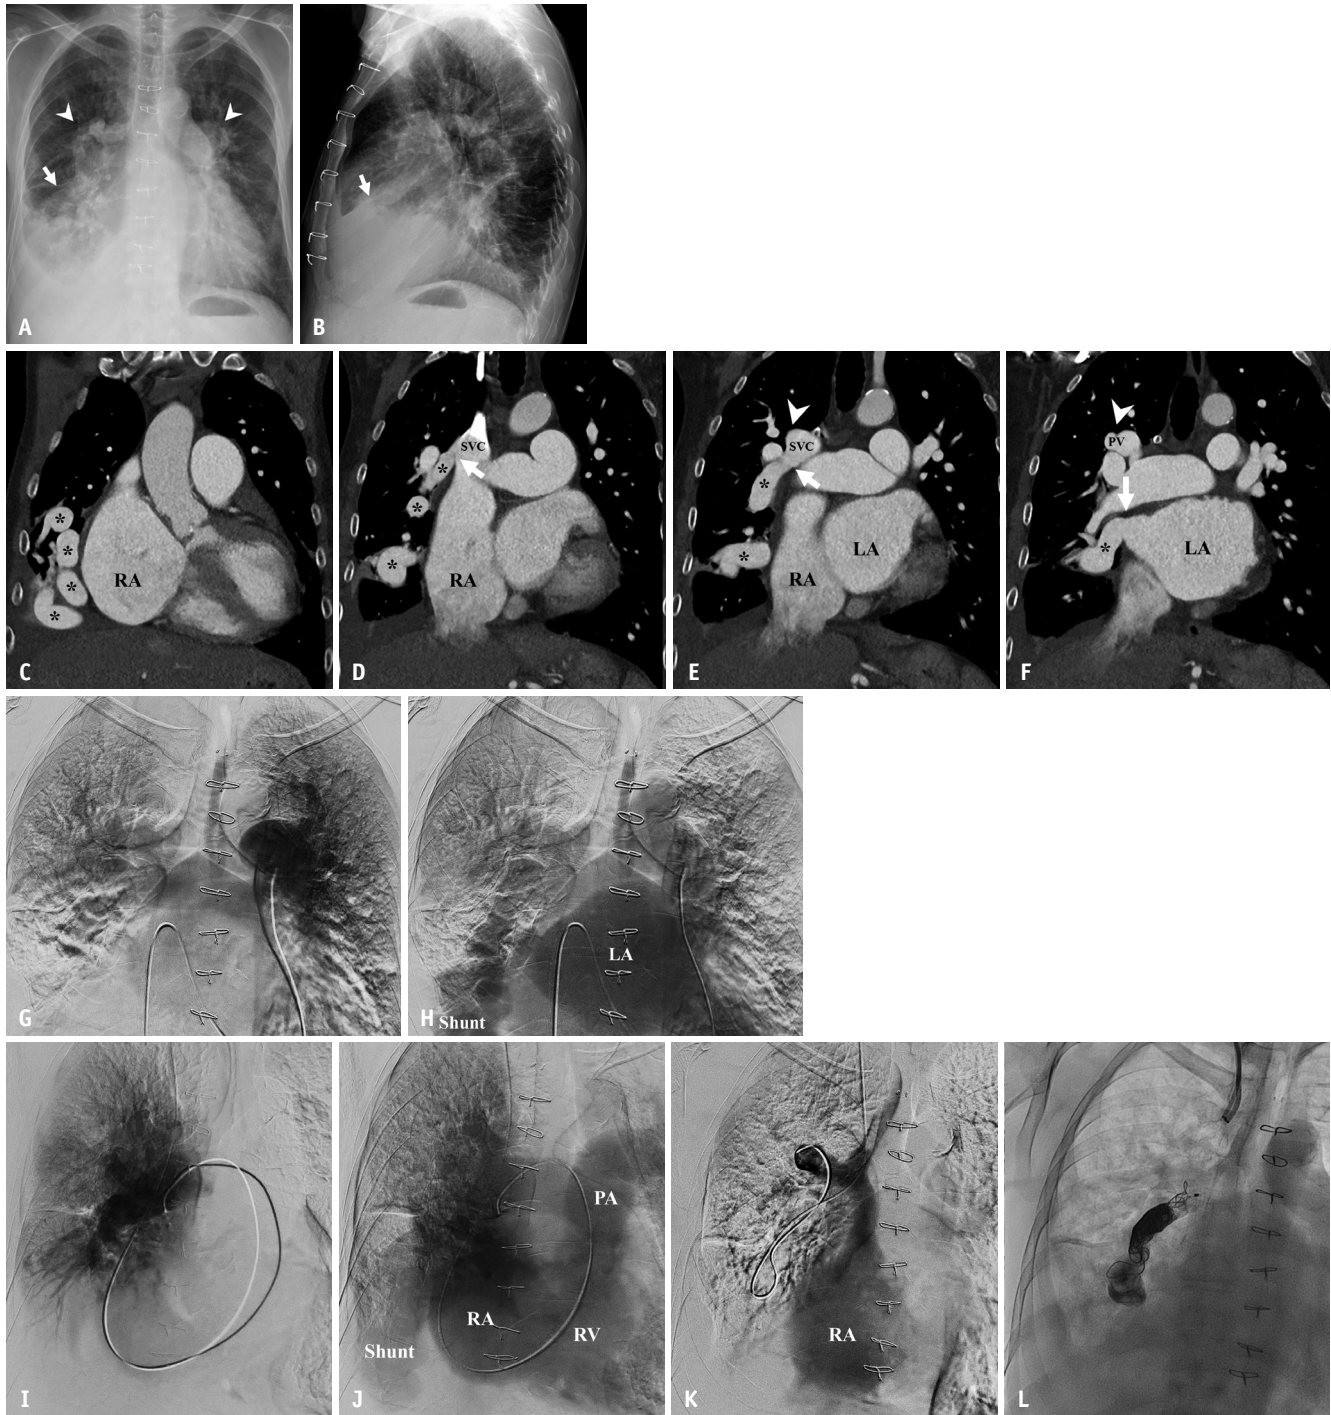

**Supplementary Fig. 11. Partial anomalous pulmonary venous drainage in a 59-year-old male who underwent mitral and aortic valve repair eleven years earlier.**

**A, B.** Posteroanterior and left lateral chest radiographs show markedly dilated central pulmonary arteries (arrowheads), cardiomegaly, and right pleural effusion. A large area of increased opacities (arrows) obscuring the right heart border and diaphragm is also noted. **C-F.** Serial coronal CT images show the right superior PV draining into the SVC (arrowheads), consistent with partial anomalous pulmonary venous drainage. There is a large tortuous abnormal vascular structure (\*) connecting the LA and the SVC (arrows), resulting in another left-to-right shunt. **G, H.** The left common pulmonary angiogram demonstrates delayed opacification of the LA and shunt vessel. **I, J.** The right common pulmonary angiogram reveals pulmonary venous drainage into the SVC and subsequent recirculation into the pulmonary trunk. **K, L.** After catheterization of the shunt vessel, coil and glue embolization was performed to reduce the left-to-right shunt. LA = left atrium, PA = pulmonary artery, PV = pulmonary vein, RA = right atrium, RV = right ventricle, SVC = superior vena cava
